# Supplementary material for: Evaluating Citrus Rootstock Tolerance to Osmotic Stress Induced by PEG in Vitro
Source: Research Square preprint supplement (doi:10.21203/rs.3.rs-8428516/v1), 2026-02-13
Supplement: Supplementary file 1 [file f83de15f00048b3c184cb37f.pdf]

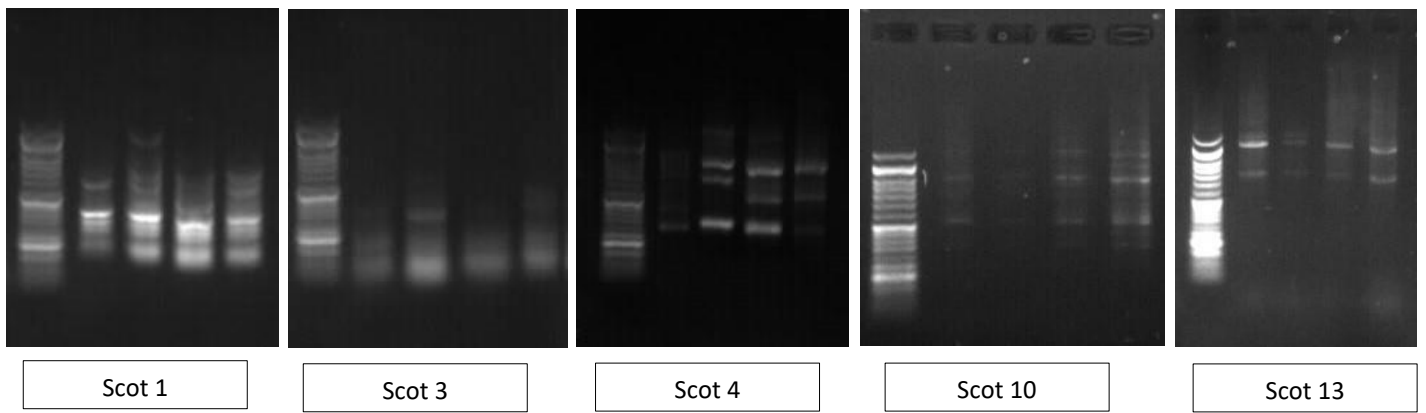

**Figure 1.** DNA polymorphism analysis of four citrus genotypes using five SCOT primers.

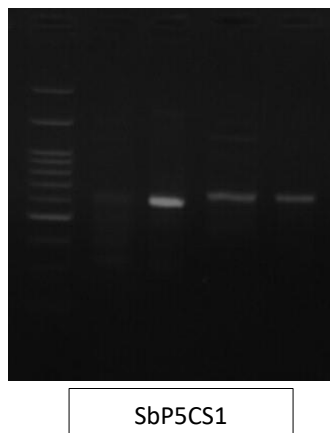

**Figure 2.** DNA polymorphism of the four citrus genotypes leaves amplified with primer proline.

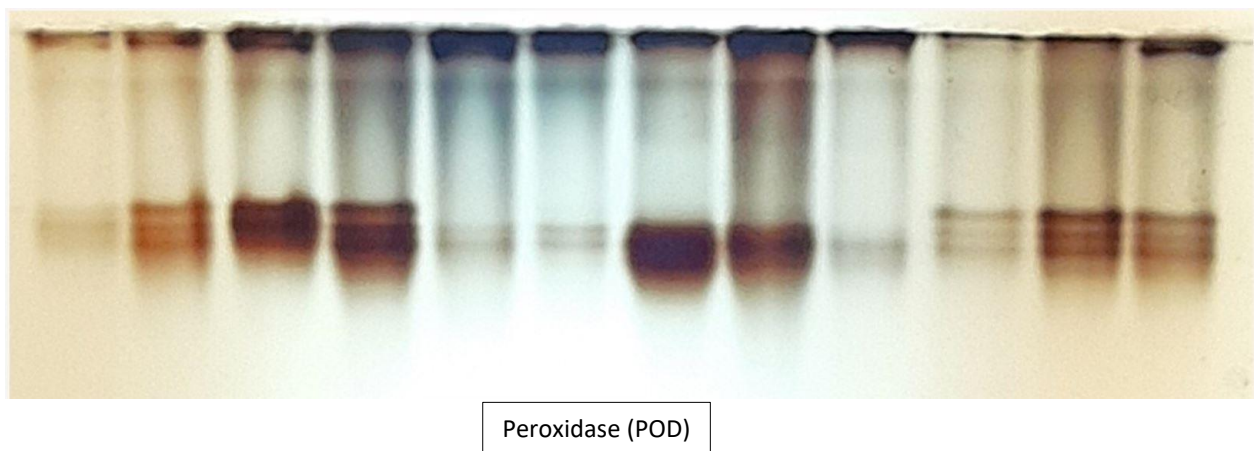

**Figure 3.** Electrophoresis of peroxidase of the four citrus genotypes leaves. Antioxidant enzyme activities (Peroxidase POD)

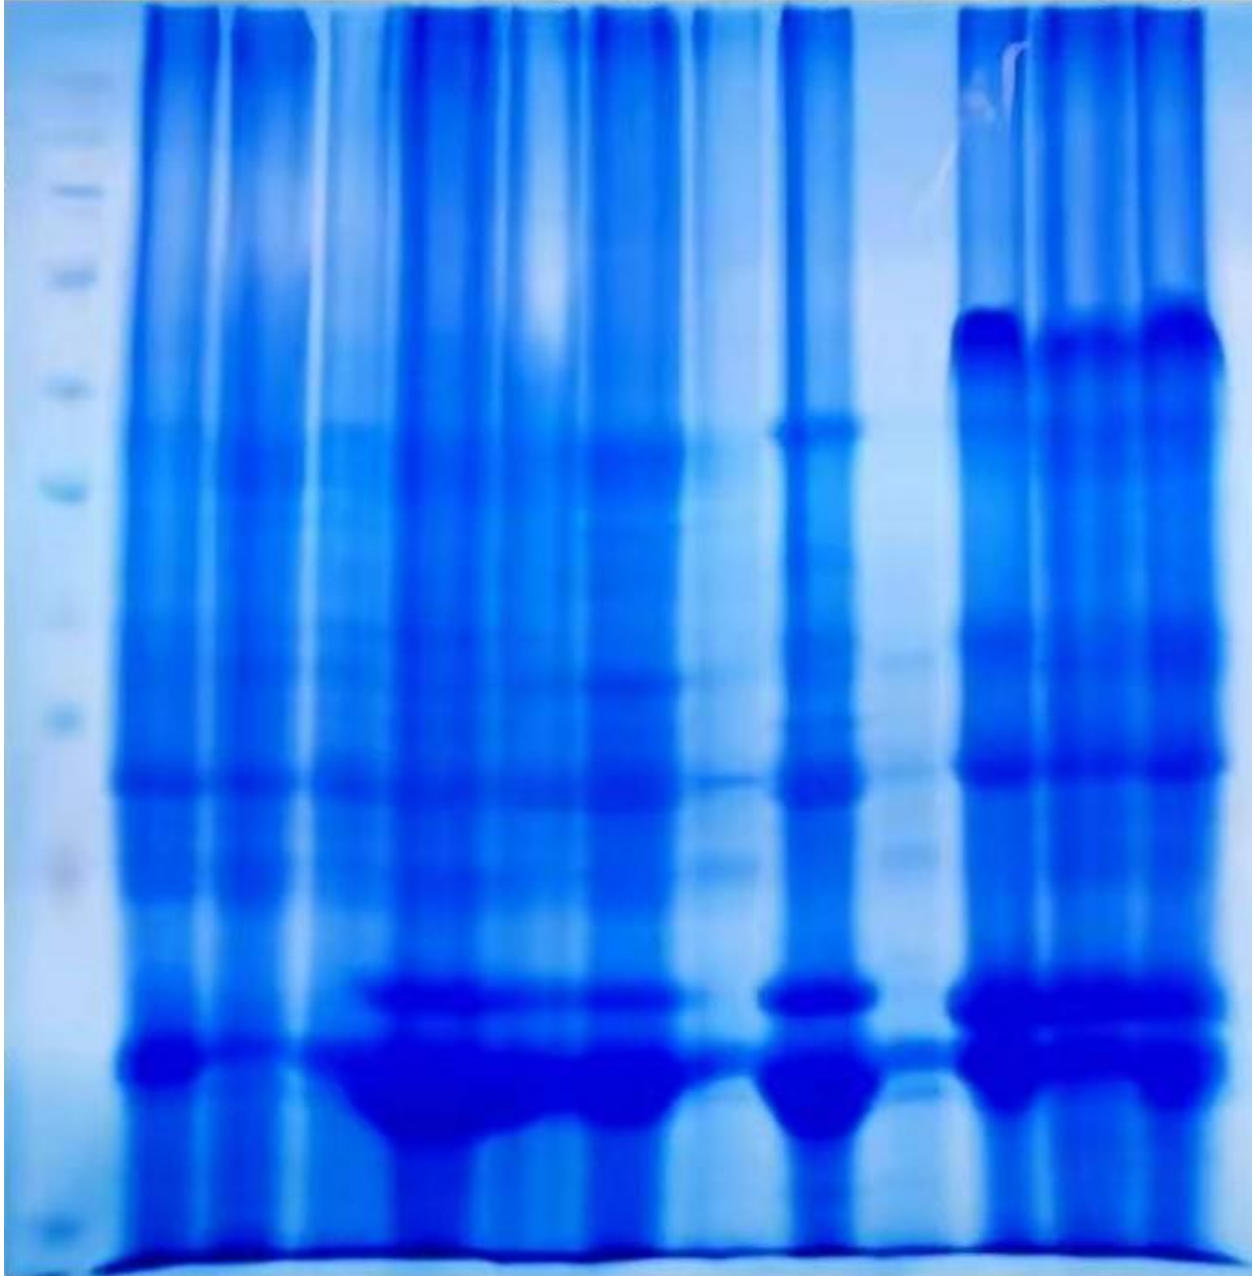

**Figure 5.** Protein electrophoresis of the four citrus genotype leaves. SDS-PAGE protein banding patterns of citrus leaves.
